# Supplementary material
Source: PubMed Central journal article supplement (PMC6148191)
Supplement: zcm004182642s1.pdf [file zcm004182642s1.pdf]

**Supplemental Table 1: Single centre/region studies assessing for clonal *Pseudomonas aeruginosa* strains**

| Country   | Region                            | Focus        | Time Period | Testing modality      | Cohort | Main Findings                                                                                                                                                                                                                                                                                          | Ref    |
|-----------|-----------------------------------|--------------|-------------|-----------------------|--------|--------------------------------------------------------------------------------------------------------------------------------------------------------------------------------------------------------------------------------------------------------------------------------------------------------|--------|
| Australia | Sydney                            | Adults       | 2001        | PFGE                  | 18     | Pilot project where 56% of patients were infected with a single <i>PA</i> clone (AES-1, now called AUST-01)                                                                                                                                                                                            | (1)    |
|           | Melbourne                         | Peds         | 1999        | PFGE                  | 152    | 55% of <i>PA</i> infected children (18% of entire clinic) were infected with a single clone (AUST-01)                                                                                                                                                                                                  | (2, 3) |
|           | Melbourne                         | Peds         | 1999-2002   | PFGE                  | 149    | After the introduction of segregated clinics, AUST-01 prevalence had fallen to 14%, although infrequent incident cases continued to be observed. This further fell to 6% by 2007(4).                                                                                                                   | (5)    |
|           | Brisbane                          | All          | 2001-2002   | ERIC-PCR, PFGE        | 100    | AUST-01 was identified in 8% of individuals. However, a more common strain called pulsotype-2 (eventually AUST-02) was found in 39% of individuals (50% of children and 28% of adults)                                                                                                                 | (6, 7) |
|           | Tasmania                          | Adults (+15) | 2003-2005   | RAPD-PCR, PFGE        | 41     | 26% were identified to have a clonal strain; AES-III, the Tasmanian-strain (now called AUST-03) and 12% were identified to have a minor strain; AES-4 or the Tasmanian minor strain, now called AUST-04). One patient with AUST-01 was identified who had previously resided in a hyper-endemic local. | (8)    |
| Belgium   | Hopital Erasme & Zeeprevenitorium | All          | 1998-1990   | PFGE                  | 31     | They identified four pairs of patients with isolates of the same pulsotype and a history which would support potential for patient to patient spread, but did not observe a wide spread clone in either location.                                                                                      | (9)    |
|           | Zeeprevenitorium De Haan          | All          | 2001-2002   | RAPD - PCR then fAFLP | 76     | Assessing serial <i>PA</i> isolates obtained during inpatient rehabilitation treatments of patients referred from one of seven Belgian CF centres for inpatient care these investigators observed 5 potential transmission events. At baseline, more than half of the patients had a clonal strain     | (10)   |

|                |                  |        |           |                 |     |                                                                                                                                                                                                                                                                                                                                                    |          |
|----------------|------------------|--------|-----------|-----------------|-----|----------------------------------------------------------------------------------------------------------------------------------------------------------------------------------------------------------------------------------------------------------------------------------------------------------------------------------------------------|----------|
|                |                  |        |           |                 |     | with the most prevalent strains accounting for 13%, 9% and 8% of all infections                                                                                                                                                                                                                                                                    |          |
| Brazil         | Porto Alegre     | NS     | 1996-1997 | PFGE            | 43  | A highly heterogeneous population of <i>PA</i> with only one pair of unrelated patients sharing an isolate.                                                                                                                                                                                                                                        | (11)     |
|                | San Paulo        | Peds   | 1996      | RAPD            | 96  | Of 38 <i>PA</i> infected children, only two occasions in which patients were infected with a similar clone were observed                                                                                                                                                                                                                           | (12)     |
|                | Rio de Janeiro   | All    | 2009      | RAPD            | 20  | While few shared strains were observed, no wide spread clones, nor known <i>ePA</i> were observed.                                                                                                                                                                                                                                                 | (13)     |
| Canada         | British Columbia | Adults | 1981-1999 | RAPD & PFGE     | 174 | A multi-decade retrospective analysis of prospectively collected isolates revealed a highly heterogeneous <i>PA</i> population. Two clones A002 and A097 (PES) were identified infecting (often transiently) 6% and 5% of the population.                                                                                                          | (14, 15) |
|                | Montreal         | Adults | 2005      | RAPD            | 60  | Only limited clonality was observed with similar strain types observed in one pair and one group of three individuals.                                                                                                                                                                                                                             | (16)     |
|                | Southern Alberta | Adults | 1979-2015 | PFGE & MLST     | 230 | A multi-decade retrospective analysis of prospectively collected isolates revealed a common clone (PES, A097) in 32% of chronically <i>PA</i> infected adults. Strain B and LES at levels of 1 and 3%, respectively were also identified.                                                                                                          | (17, 18) |
| Czech Republic | Prague           | All    | 2004      | AFLP & PFGE     | 69  | In a clinic that uses strict segregation owing to prevalent <i>Bcc</i> , only rare clusters of clones involving 3-5 individuals were found. Those with shared strains did have prior contact – generally through distantly attended summer camps.                                                                                                  | (19)     |
|                | Prague           | All    | 2005-13   | RAPD PCR & MLST | 131 | This group prospectively identified 4 clones infecting $\geq 3$ individuals including: ST253; 10 patients, ST175; 7 patients, ST395; 6 patients and ST179; 6 patients. ST253 was identified in various years through the study with no apparent epidemiological link. No previously established <i>ePA</i> strains were documented in this cohort. | (20)     |
| Denmark        | Copenhagen       | All    | 1973-     | O-              | 119 | The very first study assessing for clonal <i>PA</i> made use of                                                                                                                                                                                                                                                                                    | (21-     |

|         |            |      |           |                                   |    |                                                                                                                                                                                                                                                                                                                                                    |          |
|---------|------------|------|-----------|-----------------------------------|----|----------------------------------------------------------------------------------------------------------------------------------------------------------------------------------------------------------------------------------------------------------------------------------------------------------------------------------------------------|----------|
|         | n          |      | 1983      | antigen serotyping & Phage typing |    | phenotypic methods, admittedly less discriminatory than the later genotypic methods. While small clusters of similar isolates were identified, a larger cluster involving a MDR strain (03/9 complex, phage pattern 21/+) was observed in 22-67% of patients over time.                                                                            | (24)     |
|         | Copenhagen | All  | 1976-2005 | AT-biochips                       | 22 | In a selective sampling of patients from a large biobank, these investigators observed two predominate strains; “r” (DK-1) infecting 5 patients (identified in 1987) and “b” (DK-2) infecting 8 patients (identified in 1984). Both strains were demonstrated to super-infect patients to the eventual exclusion of previously colonizing strains. | (25)     |
|         | Utrecht    | Peds | 2004-2006 | PFGE                              | 56 | An individual clone predominated infecting 52% of individuals with chronic infection. However, in patients experiencing incident infection, a much greater diversity was observed, and this clone accounted for only 7%. This clone was not observed in non-CF samples.                                                                            | (26)     |
| France  | Paris      | Peds | 2004-5    | VNTR                              | 46 | The vast majority of individuals here had unique strains not shared amongst other clinic goers, although four small clusters involving 3-4 patients each were identified including the prevalent Clone C and PA14, environmentally ubiquitous isolates.                                                                                            | (27)     |
| Germany | Hanover    | Peds | 1983-1988 | PFGE, phage typing & serotyping   | NS | Serial isolates were retrospectively assessed for clonal relatedness, where 12 of 40 patients with incident infection were infected with a single clone, TB. Incident cases were no longer observed after strict hygiene control measures.                                                                                                         | (28)     |
|         | Hanover    | Peds | 1985-1992 | PFGE & Phage typing               | 46 | One particularly common clone - dubbed Clone C, was present in 31% of patients but this clone was similarly found widely distributed in multiple environments suggesting broad endemicity.                                                                                                                                                         | (29, 30) |
|         | Hanover    | Peds | 1998-     | A                                 | NS | Prospectively collected and stored isolates from chronically                                                                                                                                                                                                                                                                                       | (31)     |

|         |                 |       |           |                                |     |                                                                                                                                                                                                                                                                                                                                                     |      |
|---------|-----------------|-------|-----------|--------------------------------|-----|-----------------------------------------------------------------------------------------------------------------------------------------------------------------------------------------------------------------------------------------------------------------------------------------------------------------------------------------------------|------|
|         |                 |       | 2007      | custom multi-locus micro-array |     | infected and 54 incidentally infected patients. Strains commonly recovered from the environment including Clone C, OC2E and PA14 found in 15, 14 and 8 patients respectively. Analysis of the accessory genome suggested the vast majority of isolates were unrelated, and independently acquired. One presumptive transmission event was observed. |      |
| Iran    | Tehran          | Peds  | 2010      | ERIC-PRC                       | 23  | Ninety-one percent of patients admitted to hospital were infected with a single strain type, type A. This strain was observed commonly within the local hospital where CF patients sought care.                                                                                                                                                     | (32) |
| Ireland | Cork            | Peds  | 1992-1995 | RAPD PCR & PFGE                | 50  | They identified only limited genotypic diversity with 10 different strain types identified, in particular Strains A, F, G, H were identified in 12, 14, 15 and 13 individuals respectively. There was correlation in these groups with respect to presumed exposures.                                                                               | (33) |
|         | Dublin          | Peds  | 2005-2007 | PFGE                           | 68  | A clone infecting 19% of patients, evenly distributed amongst age ranges was identified. Uniquely it was never observed as a mucoid phenotype.                                                                                                                                                                                                      | (34) |
|         | Dublin          | Adult | 2005-2007 | PFGE                           | NS  | An antibiotic resistant <i>PA</i> clone, initially incorrectly identified as <i>Moraxella spp</i> via API 20NE, was found in 23 patients (11% of total clinic), with no evidence of other significant clones.                                                                                                                                       | (35) |
| Italy   | Catania, Sicily | Peds  | 1998      | RAPD-PCR                       | 12  | Two pairs of patients sharing clones were identified, including one sibling set                                                                                                                                                                                                                                                                     | (36) |
|         | Florence        | Peds  | 1998-2000 | PFGE                           | 64  | Five pairs of patients sharing a similar pulsotype were identified but no clonal strains                                                                                                                                                                                                                                                            | (37) |
|         | Verona          | All   | 2008-2009 | PFGE                           | 338 | A very heterogeneous <i>PA</i> population structure was observed although 4 clusters including; 12 (ID P14), 8 (ID P1), 8 (ID CP2) and 6 individuals (ID P6) were found                                                                                                                                                                             | (38) |

|                  |                     |        |           |                        |     |                                                                                                                                                                                                                     |              |
|------------------|---------------------|--------|-----------|------------------------|-----|---------------------------------------------------------------------------------------------------------------------------------------------------------------------------------------------------------------------|--------------|
| Netherlands      | Rotterdam           | All    | 1991-1995 | PFGE, AP-PCR           | 29  | In this longitudinal study, great heterogeneity was observed, however, 17% shared a single <i>PA</i> pulsotype                                                                                                      | (39)         |
| Northern Ireland | Belfast             | Adults | 2006      | RAPD PCR               | 29  | In a pilot study, no patients shared isolates with the same pulsotype suggesting significant diversity in <i>PA</i> . Notably, however, LES has been identified in this population(40).                             | (41)         |
| Poland           | Warsaw              | All    | 2011-2012 | PFGE                   | 75  | One <i>PA</i> clone (cluster 19; group A) was identified in 21 patients who had significant social contact. Smaller clusters with up to 7 patients were also identified.                                            | (42)         |
| Qatar            | Doha                | Peds   | 2011      | AFLP                   | 32  | Shared strains amongst members of a large extended family were observed, but no evidence of a wide spread clone.                                                                                                    | (43)<br>(44) |
| Sweden           | Gothenburg          | All    | 1999-2012 | PFGE MLVA              |     | A prospective study identified three prevalent <i>PA</i> clones; Clone J (7%), Clone B 13 (12%) and Clone A (5%). Clone J, a MDR strain, had previously been identified in CF summer camp associated outbreaks(45). | (46)         |
| Turkey           | Istanbul and Ankara | NS     | 2003      | AP-PCR                 | 46  | They identified one clone present in 15% of patients, found in both clinics. As patient details were omitted, familial relationships could not be determined.                                                       | (47)         |
| United Kingdom   | Liverpool           | Peds   | 1995      | PFGE flagellin typing  | 65  | A marked increase in CAZ resistant <i>PA</i> was observed in attendees of this clinic. 85% of patients with CAZ-R <i>PA</i> belonged to a single pulsotype, dubbed LES                                              | (48)         |
|                  | Manchester          | Adults | 2000      | PFGE and pyocin typing | 154 | A prospective study identified 14% of individuals with a novel clonal <i>PA</i> strain, dubbed Manchester (MA). Notably, this clone was absent in patients segregated owing to <i>Bcc</i> co-infection.             | (49)         |
|                  | Liverpool           | Adults | 2001-2002 | PFGE and PS21-PCR      | 92  | 68% of patients, and 79% of <i>PA</i> infected patients were infected with LES. PCR detection of <i>ePA</i> by whole sputum was demonstrated to be highly sensitive and specific.                                   | (50)         |
|                  | Manchester          | Adult  | 2000-2003 | PFGE                   | 243 | In this prospective study, the prevalence of both MA and LES increased slowly to 19% over four years. Furthermore,                                                                                                  | (51)         |

|               |                |       |           |         |     |                                                                                                                                                                                                          |      |
|---------------|----------------|-------|-----------|---------|-----|----------------------------------------------------------------------------------------------------------------------------------------------------------------------------------------------------------|------|
|               |                |       |           |         |     | three small novel <i>PA</i> clusters involving 3-8 patients were observed. After cohort segregation, no new cases of <i>ePA</i> were observed.                                                           |      |
|               | Midlands       | Adult | 2001-2003 | PFGE    | 157 | LES was identified in 11% of attendees, MA in 1% and several small clusters involving 2-7 individuals. However, a novel <i>ePA</i> , the Midlands-1 (Md1) strain was found to infect 30% of the cohort.  | (52) |
| United States | Houston, Texas | Peds  | 2004-2011 | rep-PCR | 71  | In a prospective study, those patients with chronic <i>P. aeruginosa</i> resistant to $\geq 2$ classes of antibiotics were screened for clonality. A single isolate, Houston-1 infected 45% of patients. |      |

Definitions; PA=Pseudomonas aeruginosa, ePA = *epidemic P. aeruginosa*, Peds=Pediatric, All= Adult and Pediatric patients, LES=Liverpool Epidemic Strain, PES= Prairie Epidemic Strain, Bcc=*Burkholderia cepacia* complex, CAZ=ceftazidime, R=resistant, NS=not stated, MA= Manchester epidemic strain

### Supplemental References

1. **Anthony M, Rose B, Pegler MB, Elkins M, Service H, Thamotharampillai K, Watson J, Robinson M, Bye P, Merlino J, Harbour C.** 2002. Genetic analysis of Pseudomonas aeruginosa isolates from the sputa of Australian adult cystic fibrosis patients. J Clin Microbiol **40**:2772-2778.
2. **Armstrong DS, Nixon GM, Carzino R, Bigham A, Carlin JB, Robins-Browne RM, Grimwood K.** 2002. Detection of a widespread clone of Pseudomonas aeruginosa in a pediatric cystic fibrosis clinic. Am J Respir Crit Care Med **166**:983-987.
3. **Armstrong DS, Grimwood K, Carlin JB, Carzino R, Gutierrez JP, Hull J, Olinsky A, Phelan EM, Robertson CF, Phelan PD.** 1997. Lower airway inflammation in infants and young children with cystic fibrosis. Am J Respir Crit Care Med **156**:1197-1204.
4. **Griffiths AL, Wurzel DF, Robinson PJ, Carzino R, Massie J.** 2012. Australian epidemic strain pseudomonas (AES-1) declines further in a cohort segregated cystic fibrosis clinic. J Cyst Fibros **11**:49-52.

5. **Griffiths AL, Jansen K, Carlin JB, Grimwood K, Carzino R, Robinson PJ, Massie J, Armstrong DS.** 2005. Effects of segregation on an epidemic *Pseudomonas aeruginosa* strain in a cystic fibrosis clinic. *Am J Respir Crit Care Med* **171**:1020-1025.
6. **O'Carroll MR, Syrmis MW, Wainwright CE, Greer RM, Mitchell P, Coulter C, Sloots TP, Nissen MD, Bell SC.** 2004. Clonal strains of *Pseudomonas aeruginosa* in paediatric and adult cystic fibrosis units. *Eur Respir J* **24**:101-106.
7. **Syrmis MW, O'Carroll MR, Sloots TP, Coulter C, Wainwright CE, Bell SC, Nissen MD.** 2004. Rapid genotyping of *Pseudomonas aeruginosa* isolates harboured by adult and paediatric patients with cystic fibrosis using repetitive-element-based PCR assays. *J Med Microbiol* **53**:1089-1096.
8. **Bradbury R, Champion A, Reid DW.** 2008. Poor clinical outcomes associated with a multi-drug resistant clonal strain of *Pseudomonas aeruginosa* in the Tasmanian cystic fibrosis population. *Respirology* **13**:886-892.
9. **Struelens MJ, Schwam V, Deplano A, Baran D.** 1993. Genome macrorestriction analysis of diversity and variability of *Pseudomonas aeruginosa* strains infecting cystic fibrosis patients. *J Clin Microbiol* **31**:2320-2326.
10. **Van Daele SG, Franckx H, Verhelst R, Schelstraete P, Haerynck F, Van Simaey L, Claeys G, Vaneechoutte M, de Baets F.** 2005. Epidemiology of *Pseudomonas aeruginosa* in a cystic fibrosis rehabilitation centre. *Eur Respir J* **25**:474-481.
11. **Silbert S, Barth AL, Sader HS.** 2001. Heterogeneity of *Pseudomonas aeruginosa* in Brazilian cystic fibrosis patients. *J Clin Microbiol* **39**:3976-3981.
12. **da Silva Filho LV, Levi JE, Bento CN, Rodrigues JC, da Silvo Ramos SR.** 2001. Molecular epidemiology of *Pseudomonas aeruginosa* infections in a cystic fibrosis outpatient clinic. *J Med Microbiol* **50**:261-267.
13. **Leao R, Carvalho-Assef, APD, Ferreira, AG, Folescu, TW, Barth, AL, Pitt, TL and EA Marques.** 2010. Comparison of the worldwide transmissible *Pseudomonas aeruginosa* with isolates from Brazilian cystic fibrosis patients. *Brazilian Journal of Microbiology* **41**:1079-1081.
14. **Speert DP, Campbell ME, Henry DA, Milner R, Taha F, Gravelle A, Davidson AG, Wong LT, Mahenthiralingam E.** 2002. Epidemiology of *Pseudomonas aeruginosa* in cystic fibrosis in British Columbia, Canada. *Am J Respir Crit Care Med* **166**:988-993.
15. **Campbell M, Mahenthiralingam E, Speert DP.** 2000. Evaluation of random amplified polymorphic DNA typing of *Pseudomonas aeruginosa*. *J Clin Microbiol* **38**:4614-4615.
16. **Hafiane A, Ravaoarinoro M.** 2011. Characterization of *Pseudomonas aeruginosa* strains isolated from cystic fibrosis patients by different typing methods. *Pathol Biol (Paris)* **59**:e109-114.

17. **Parkins MD, Glezerson BA, Sibley CD, Sibley KA, Duong J, Purighalla S, Mody CH, Workentine ML, Storey DG, Surette MG, Rabin HR.** 2014. Twenty-five-year outbreak of *Pseudomonas aeruginosa* infecting individuals with cystic fibrosis: identification of the prairie epidemic strain. *J Clin Microbiol* **52**:1127-1135.
18. **Somayaji R, Lam JC, Surette MG, Waddell B, Rabin HR, Sibley CD, Purighalla S, Parkins MD.** 2017. Long-term clinical outcomes of 'Prairie Epidemic Strain' *Pseudomonas aeruginosa* infection in adults with cystic fibrosis. *Thorax* **72**:333-339.
19. **Vosahlikova S, Drevinek P, Cinek O, Pohunek P, Maixnerova M, Urbaskova P, van den Reijden TJ, Dijkshoorn L, Nemec A.** 2007. High genotypic diversity of *Pseudomonas aeruginosa* strains isolated from patients with cystic fibrosis in the Czech Republic. *Res Microbiol* **158**:324-329.
20. **Kalferstova L, Vilimovska Dedekova K, Antuskova M, Melter O, Drevinek P.** 2016. How and why to monitor *Pseudomonas aeruginosa* infections in the long term at a cystic fibrosis centre. *J Hosp Infect* **92**:54-60.
21. **Hoiby N, Rosendal K.** 1980. Epidemiology of *Pseudomonas aeruginosa* infection in patients treated at a cystic fibrosis centre. *Acta Pathol Microbiol Scand B* **88**:125-131.
22. **Bergan T, Hoiby N.** 1975. Epidemiological markers for *Pseudomonas aeruginosa*. 6. Relationship between concomitant non-mucoid and mucoid strains from the respiratory tract in cystic fibrosis. *Acta Pathol Microbiol Scand Suppl* **83**:553-560.
23. **Pedersen SS, Koch C, Hoiby N, Rosendal K.** 1986. An epidemic spread of multiresistant *Pseudomonas aeruginosa* in a cystic fibrosis centre. *J Antimicrob Chemother* **17**:505-516.
24. **Zimakoff J, Hoiby N, Rosendal K, Guilbert JP.** 1983. Epidemiology of *Pseudomonas aeruginosa* infection and the role of contamination of the environment in a cystic fibrosis clinic. *J Hosp Infect* **4**:31-40.
25. **Jelsbak L, Johansen HK, Frost AL, Thogersen R, Thomsen LE, Ciofu O, Yang L, Haagenzen JA, Hoiby N, Molin S.** 2007. Molecular epidemiology and dynamics of *Pseudomonas aeruginosa* populations in lungs of cystic fibrosis patients. *Infect Immun* **75**:2214-2224.
26. **Tramper-Stranders GA, van der Ent CK, Wolfs TF, Kimpen JL, Fleer A, Johansen U, Johansen HK, Hoiby N.** 2008. *Pseudomonas aeruginosa* diversity in distinct paediatric patient groups. *Clin Microbiol Infect* **14**:935-941.
27. **Vu-Thien H, Corbineau G, Hormigos K, Fauroux B, Corvol H, Clement A, Vergnaud G, Pourcel C.** 2007. Multiple-locus variable-number tandem-repeat analysis for longitudinal survey of sources of *Pseudomonas aeruginosa* infection in cystic fibrosis patients. *J Clin Microbiol* **45**:3175-3183.
28. **Tummler B, Koopmann U, Grothues D, Weissbrodt H, Steinkamp G, von der Hardt H.** 1991. Nosocomial acquisition of *Pseudomonas aeruginosa* by cystic fibrosis patients. *J Clin Microbiol* **29**:1265-1267.



29. **Romling U, Wingender J, Muller H, Tummeler B.** 1994. A major *Pseudomonas aeruginosa* clone common to patients and aquatic habitats. *Appl Environ Microbiol* **60**:1734-1738.
30. **Romling U, Fiedler B, Bosshammer J, Grothues D, Greipel J, von der Hardt H, Tummeler B.** 1994. Epidemiology of chronic *Pseudomonas aeruginosa* infections in cystic fibrosis. *J Infect Dis* **170**:1616-1621.
31. **Wiehlmann L, Cramer N, Ulrich J, Hedtfeld S, Weissbrodt H, Tummeler B.** 2012. Effective prevention of *Pseudomonas aeruginosa* cross-infection at a cystic fibrosis centre - results of a 10-year prospective study. *Int J Med Microbiol* **302**:69-77.
32. **Ghazi M, Khanbabaee G, Fallah F, Kazemi B, Mahmoudi S, Navidnia M, Pourakbari B, Bakhshi B, Goudarzi H.** 2012. Emergence of *Pseudomonas aeruginosa* cross-infection in children with cystic fibrosis attending an Iranian referral pediatric center. *Iran J Microbiol* **4**:124-129.
33. **Adams C, Morris-Quinn M, McConnell F, West J, Lucey B, Shortt C, Cryan B, Watson JB, O'Gara F.** 1998. Epidemiology and clinical impact of *Pseudomonas aeruginosa* infection in cystic fibrosis using AP-PCR fingerprinting. *J Infect* **37**:151-158.
34. **Logan C, Habington A, Lennon G, Grogan J, Byrne M, O'Leary J, O'Sullivan N.** 2012. Genetic relatedness of *Pseudomonas aeruginosa* isolates among a paediatric cystic fibrosis patient cohort in Ireland. *J Med Microbiol* **61**:64-70.
35. **Keating D, Crowe MJ, Kennedy B, Salmon A, Britton D, Gallagher CG, McKone EF, Schaffer K.** 2013. Molecular detection of an atypical, highly resistant, clonal *Pseudomonas aeruginosa* isolate in cystic fibrosis patients. *J Cyst Fibros* **12**:141-146.
36. **Agodi A, Sciacca A, Campanile F, Messina C, Barchitta M, Sciacca S, Stefani S.** 2000. Molecular epidemiology of *Pseudomonas aeruginosa* from cystic fibrosis in Sicily: genome macrorestriction analysis and rapid PCR-ribotyping. *New Microbiol* **23**:319-327.
37. **Campana S, Taccetti G, Ravenni N, Masi I, Audino S, Sisi B, Repetto T, Doring G, de Martino M.** 2004. Molecular epidemiology of *Pseudomonas aeruginosa*, Burkholderia cepacia complex and methicillin-resistant *Staphylococcus aureus* in a cystic fibrosis center. *J Cyst Fibros* **3**:159-163.
38. **Cigana C, Melotti P, Baldan R, Pedretti E, Pintani E, Iansa P, De Fino I, Favari F, Bergamini G, Tridello G, Cirillo DM, Assael BM, Bragonzi A.** 2016. Genotypic and phenotypic relatedness of *Pseudomonas aeruginosa* isolates among the major cystic fibrosis patient cohort in Italy. *BMC Microbiol* **16**:142.
39. **Renders N, van Belkum A, Barth A, Goessens W, Mouton J, Verbrugh H.** 1996. Typing of *Pseudomonas aeruginosa* strains from patients with cystic fibrosis: phenotyping versus genotyping. *Clin Microbiol Infect* **1**:261-265.

40. **Kakinuma Y, Goldsmith CE, Watt A, Elborn JS, Maeda Y, Rendall JC, Hall V, McCaughan J, Reid A, Millar BC, Matsuda M, Moore JE.** 2010. Molecular conservation within LES9F and PS21 liverpool epidemic strain (LES) markers in wild-type clinical pseudomonas aeruginosa isolated from the sputum of adult patients with cystic fibrosis. *Br J Biomed Sci* **67**:87-88.
41. **Clarke L, Moore JE, Millar BC, Crowe M, Xu J, Goldsmith CE, Murphy RG, Dooley JS, Rendall J, Elborn JS.** 2008. Molecular epidemiology of Pseudomonas aeruginosa in adult patients with cystic fibrosis in Northern Ireland. *Br J Biomed Sci* **65**:18-21.
42. **Milczewska J, Wolkowicz T, Zacharczuk K, Kwiatkowska M.** 2015. Cross-infections with Pseudomonas aeruginosa in patients with cystic fibrosis attending the Warsaw Centre. *Dev Period Med* **19**:60-65.
43. **AbdulWahab A, Taj-Aldeen SJ, Ibrahim E, Abdulla SH, Muhammed R, Ahmed I, Abdeen Y, Sadek O, Abu-Madi M.** 2014. Genetic relatedness and host specificity of Pseudomonas aeruginosa isolates from cystic fibrosis and non-cystic fibrosis patients. *Infect Drug Resist* **7**:309-316.
44. **Abdul Wahab A, Taj-Aldeen SJ, Hagen F, Diophode S, Saadoon A, Meis JF, Klaassen CH.** 2014. Genotypic diversity of Pseudomonas aeruginosa in cystic fibrosis siblings in Qatar using AFLP fingerprinting. *Eur J Clin Microbiol Infect Dis* **33**:265-271.
45. **Meyer P, Johansson, E., Welinder-Olsson, C., Lindblad, A., Hjelte, I. and F. Karpati.** 2007. Pseudomonas aeruginosa transmission at a winter camp in spite of rigorous precautions. *Journal of Cystic Fibrosis* **6**:114.
46. **Johansson E, Welinder-Olsson C, Gilljam M, Pourcel C, Lindblad A.** 2015. Genotyping of Pseudomonas aeruginosa reveals high diversity, stability over time and good outcome of eradication. *J Cyst Fibros* **14**:353-360.
47. **Yagci A, Ciragil P, Over U, Sener B, Erturan Z, Soyletir G.** 2003. Typing of Pseudomonas aeruginosa strains in Turkish cystic fibrosis patients. *New Microbiol* **26**:109-114.
48. **Cheng K, Smyth RL, Govan JR, Doherty C, Winstanley C, Denning N, Heaf DP, van Saene H, Hart CA.** 1996. Spread of beta-lactam-resistant Pseudomonas aeruginosa in a cystic fibrosis clinic. *Lancet* **348**:639-642.
49. **Jones AM, Govan JR, Doherty CJ, Dodd ME, Isalska BJ, Stanbridge TN, Webb AK.** 2001. Spread of a multiresistant strain of Pseudomonas aeruginosa in an adult cystic fibrosis clinic. *Lancet* **358**:557-558.
50. **Panagea S, Winstanley C, Parsons YN, Walshaw MJ, Ledson MJ, Hart CA.** 2003. PCR-based detection of a cystic fibrosis epidemic strain of Pseudomonas Aeruginosa. *Mol Diagn* **7**:195-200.
51. **Jones AM, Dodd ME, Govan JR, Doherty CJ, Smith CM, Isalska BJ, Webb AK.** 2005. Prospective surveillance for Pseudomonas aeruginosa cross-infection at a cystic fibrosis center. *Am J Respir Crit Care Med* **171**:257-260.

52. **Chambers D, Scott F, Bangur R, Davies R, Lim A, Walters S, Smith G, Pitt T, Stableforth D, Honeybourne D.** 2005. Factors associated with infection by *Pseudomonas aeruginosa* in adult cystic fibrosis. *Eur Respir J* **26**:651-656.
